# Supplementary material for: Geomorphological response of sandy beach to tropical cyclones with different characteristics
Source: Frontiers journal article supplement (doi:10.3389/fmars.2022.1010523), 2022-10-21
Supplement: Table_1.DOCX [file Table_1.DOCX]

**Table. S1.** Description of field investigations.

| **Typhoon**  **name** | **Date of pre- measurement** | **Date of post- measurement** | **Interval** | **Average length of measurement line (m)** |
| --- | --- | --- | --- | --- |
| Lekima | 3 July, 2019 | August 17, 2019  (four days after dissipating) | 45 days | 180 |
| Bavi | 26 August, 2020 | August 27, 2020  (three hours after landfall) | 24 hours | 80 |
